# Supplementary material for: Bioinspired fabrication of 3D hierarchical porous nanomicrostructures of calcium carbonate for bone regeneration
Source: Royal Society of Chemistry journal article supplement (doi:10.1039/c0cc01348j), 2010-01-01
Supplement: c0cc01348j.pdf [file c0cc01348j.pdf]

# Supporting Information

## Bioinspired Fabrication of 3D Hierarchical Porous Nanomicrostructures of Calcium Carbonate for Bone Regeneration

### Experimental Section

*Fabrication of nanoporous CaCO<sub>3</sub> microcrystals:* Typically, a glass Petri dish was filled up with 1 M calcium nitrate (99%, A.C.S. reagent, Sigma-Aldrich) solution and then placed in a closed desiccator containing a 10-mL vial of ammonium carbonate (A.C.S. reagent, Aldrich). After 3-day reaction at room temperature (~25 °C), the white products were removed from the Petri dish, washed with DI water for 3 times and dried at 65 °C for 3 h. As a result, different sized calcium carbonate microcrystals were obtained to have 5 and 50 μm in size by prolonging the reaction time from 6 hours to 3 days. For heat treatment, the temperature of a furnace (Nabertherm, model N 11/H with a program controller, Germany) was first increased to a predetermined temperature of 900 °C. After being stabilized for 0.5 h, the as-prepared calcium carbonate microcrystals in a crucible were put into the furnace and then heated for 1 h. The as-decomposed product was then taken out of the furnace at the same temperature and cooled to room temperature at ambient conditions. Shape and morphology of the as-prepared samples were examined by JEOL JSM-6700 field-emission scanning electron microscope (SEM).

*Fabrication of hierarchical CaCO<sub>3</sub> scaffolds:* A special mold has been designed for the construction of CaCO<sub>3</sub> scaffolds with hierarchical pore sizes. The nano-/micro-porous CaCO<sub>3</sub> microcrystals were loaded into the mold as building blocks and the macro-pores of the scaffolds were generated in the mold by using pins with a diameter of 500 μm. A

supersaturated solution of calcium nitrate was added to interconnect the nano-/micro-porous  $\text{CaCO}_3$  microcrystals by newly formed  $\text{CaCO}_3$  in the  $\text{CO}_2$  environment (same as the conditions for crystal growth).

*In vitro evaluation:* MC3T3-E1 osteoblasts were maintained in  $\alpha$ -MEM medium supplemented with 2.0 mM L-glutamine, 1.0 mM sodium pyruvate, 10% fetal bovine serum and 1% penicillin-streptomycin solution. The osteoblasts were seeded onto the  $\text{CaCO}_3$  scaffolds in 24-wells plate after the scaffolds were soaked with the culture medium for 1 h. After 14 days of culture, the scaffolds were taken out and rinsed with PBS for 2 times. Cell adhesion and proliferation were observed under confocal laser scanning microscopy (Olympus FV500, Japan) with the cells fixed and then stained with propidium iodide (PI, Invitrogen).

*In vivo evaluation:* Surgery of male Sprague Dawley rats was performed under general anesthesia and aseptic conditions. After a longitudinal skin incision to expose femurs, two large holes with diameters of 3 mm were made on each femur using surgical drill: one hole was filled with porous  $\text{CaCO}_3$  while the other was left empty as control. New bone formation within the defect regions was evaluated using micro-computed tomography (micro-CT, Skyscan 1076, Belgium) imaging. Samples were scanned through  $180^\circ$  with a rotation step of  $1^\circ$  at a spatial resolution of 35  $\mu\text{m}$ . The scan files were reconstructed at a step size of 1 using a modified Feldkamp algorithm and the reconstructed data were loaded onto the 3D modeling software, VGstudio (Volume Graphics GmbH, Germany) to stack the 2D image into a 3D model for further analysis. A threshold value of 180 was applied to segment the bone tissue from the surrounding soft tissue.

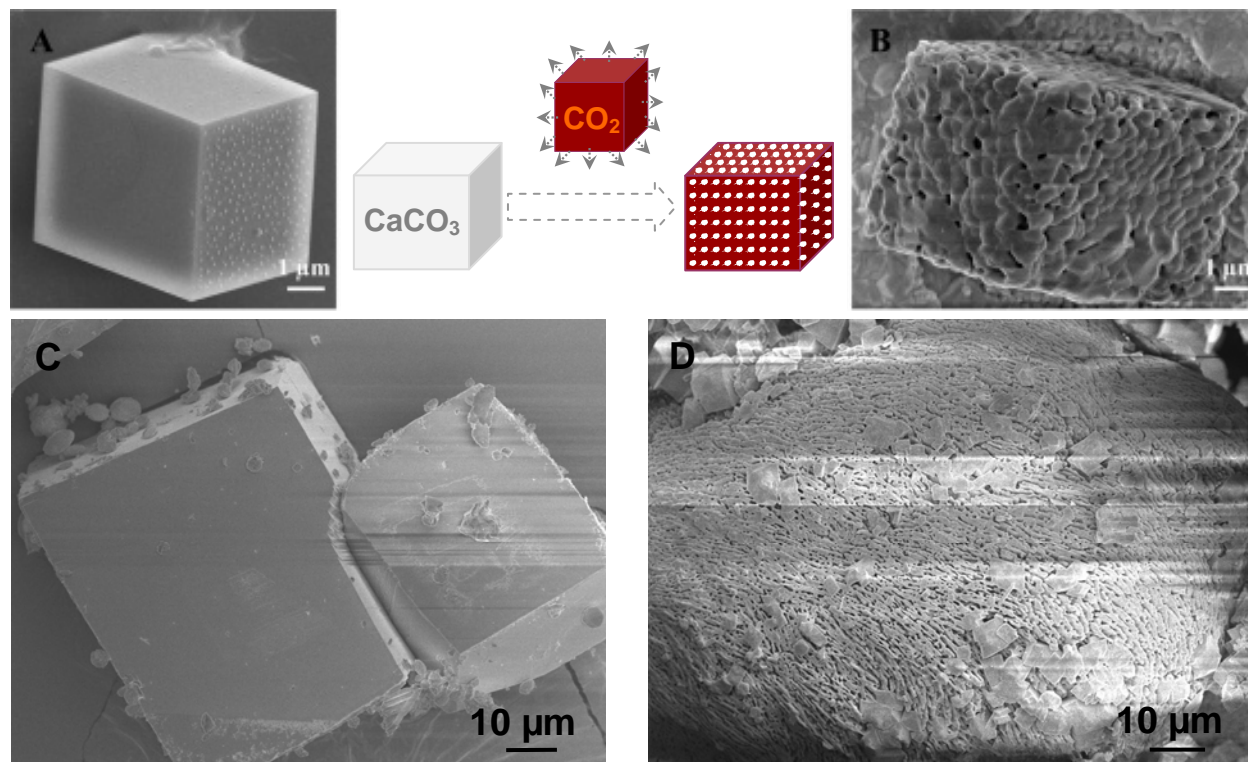

**Fig. S1** SEM images of small CaCO<sub>3</sub> microcrystals of ~5 μm in size (A) before and (B) after 0.5-h heat treatment at 900 °C. SEM images of large CaCO<sub>3</sub> microcrystals of ~50 μm in size (C) before and (D) after 1-h heat treatment at 900 °C. Longer thermal treatment has been applied to larger microcrystals for complete formation of porous structure throughout the crystal. Schematic illustration of the formation process was shown in the middle.

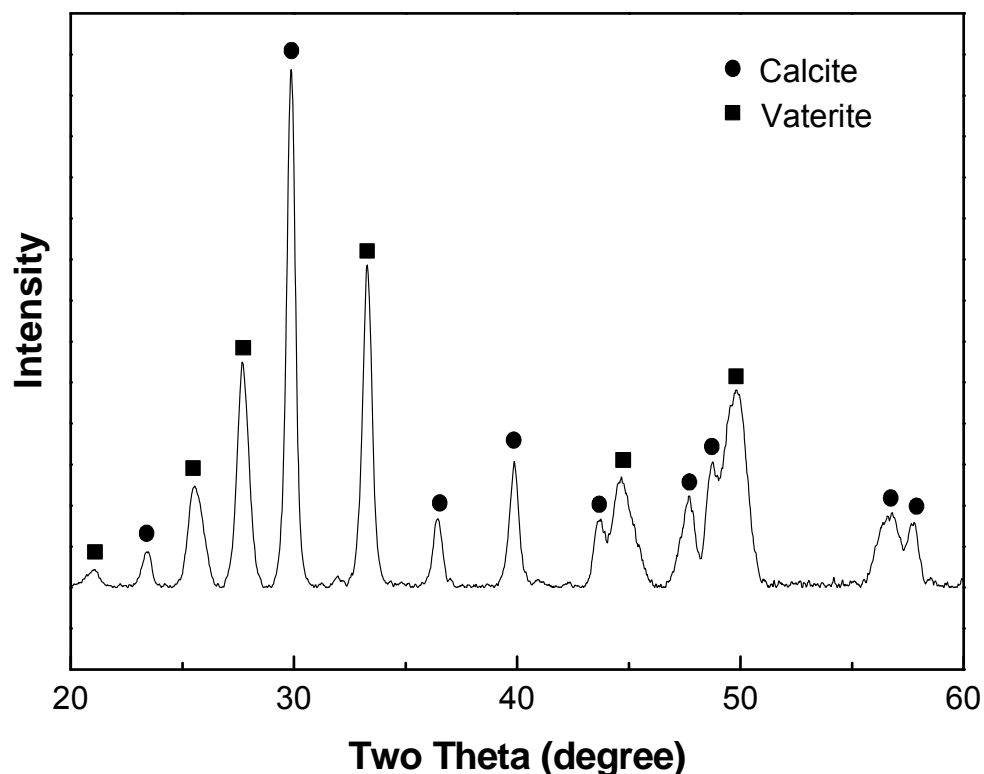

**Fig. S2** XRD pattern of 50- $\mu\text{m}$   $\text{CaCO}_3$  microcrystals that was treated in a furnace at 900  $^\circ\text{C}$  for 1 h before taking out at the same temperature.

Experimentally, the as-prepared  $\text{CaCO}_3$  microcrystals were put into a furnace at 900  $^\circ\text{C}$ . After remaining at this temperature for 1 h, the thermally treated product was taken out and then cooled to room temperature naturally. The existence of two  $\text{CaCO}_3$  polymorphs calcite and vaterite was revealed by XRD. The fast temperature increase from room temperature to 900  $^\circ\text{C}$  led to the formation of highly porous  $\text{CaO}$  structure, which reacted with  $\text{H}_2\text{O}$  and  $\text{CO}_2$  to form  $\text{Ca}(\text{OH})_2$  and  $\text{CaCO}_3$  and further converted into  $\text{CaCO}_3$  quickly. This result suggested the porous structure throughout the crystals. XRD measurement was performed within 1 h after the thermal treatment.

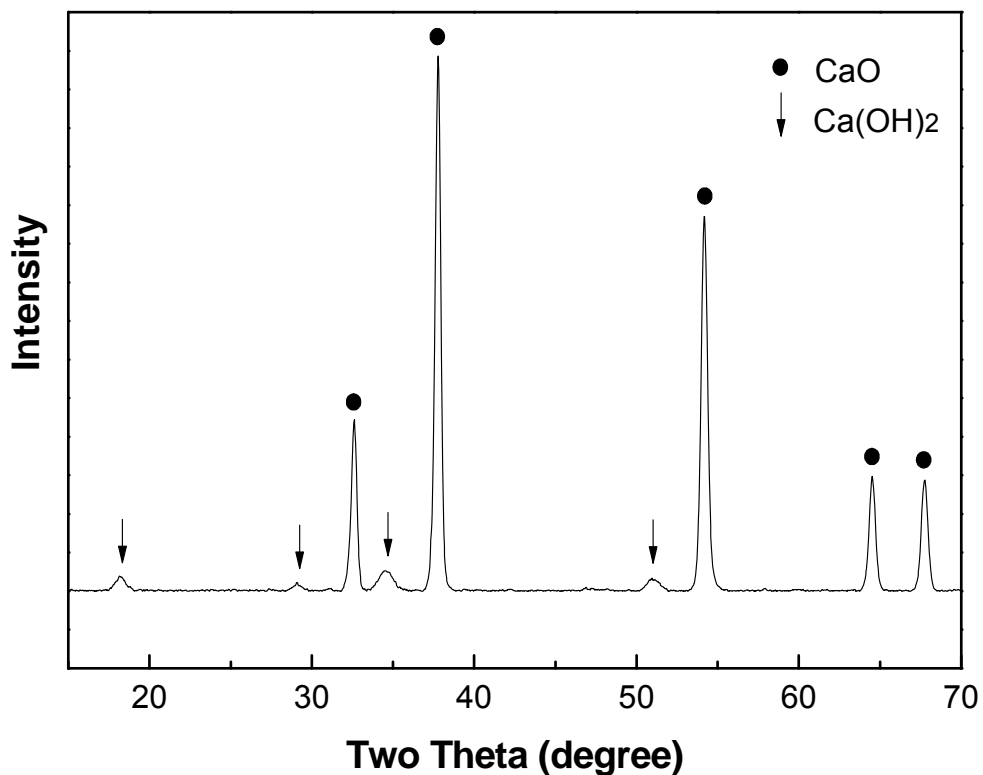

**Fig. S3** XRD pattern of 50- $\mu\text{m}$   $\text{CaCO}_3$  microcrystals that was first treated in a programmable furnace while temperature was going up to 900 °C followed by 1-h heat treatment at the same temperature before taking out.

Experimentally, the as-prepared  $\text{CaCO}_3$  microcrystals were put into a programmable furnace which took 2 h to gradually increase to 900 °C. After remaining at this temperature for 1 h, the thermally treated product was taken out and then cooled to room temperature naturally. The co-existence of CaO and  $\text{Ca(OH)}_2$  was revealed by XRD. The slow temperature increase from room temperature to 900 °C led to the formation of less porous CaO structure, which quickly reacted with  $\text{H}_2\text{O}$  to form dense surface coating of  $\text{Ca(OH)}_2$  for protecting remained CaO internally while decreasing the temperature to room temperature. These remained CaO and  $\text{Ca(OH)}_2$  slowly reacted with  $\text{CO}_2$  and eventually converted into  $\text{CaCO}_3$  after 5 days. XRD measurement was performed within 1 h after the thermal treatment.
